# Supplementary material for: Acidithiobacillus ferrooxidans metabolism: from genome sequence to industrial applications
Source: PubMed Central journal article supplement (PMC2621215; doi:10.1186/1471-2164-9-597), 2008-12-11
Supplement: 1471-2164-9-597-S3.pdf [file 1471-2164-9-597-S3.pdf]

**Transposase families present in the *A. ferrooxidans* genome sequence.**

| Sequence group                                           | Mahillon and Chandler family classification (129) | Size (bp) | Copy number | % Sequence nucleotide identity | Gene ID                                                                         |
|----------------------------------------------------------|---------------------------------------------------|-----------|-------------|--------------------------------|---------------------------------------------------------------------------------|
| ISafe1                                                   | NF                                                | NF        | NF          | NF                             | NF                                                                              |
| ISafe2                                                   | Ist2                                              | 1263      | 1           | NF                             | AFE1330                                                                         |
| ISafe3                                                   | Is110                                             | 1227      | 8           | 100                            | AFE2972, AFE2709, AFE2432, AFE1265, AFE1142, AFE1110, AFE0550, AFE3263          |
| ISafe4 (orf1, 2 and 3)                                   | Is3                                               | 2358      | 3           | >96                            | AFE2939, AFE2468, AFE1709, AFE2938, AFE2469, AFE1708, AFE2470, AFE1706, AFE2937 |
| ISafe5 (orfA and B)                                      | Is3                                               | 940       | 1           | NF                             | AFE2393, AFE2394                                                                |
| ISafe6                                                   | Is630                                             | 693       | 3           | NF                             | AFE1655, AFE3105 <sup>†</sup> , AFE3157 <sup>†</sup>                            |
| ISafe7 (orfA and orfB)                                   | Is3                                               | 1241      | 1           | NF                             | AFE1610, AFE1608                                                                |
| ISafe8                                                   | Is200/Is605                                       | 1227      | 2           | >99                            | AFE1215, AFE1058                                                                |
| ISafe9<br>(transposase and transposition helper protein) | Is21                                              | 1485      | 1           | NF                             | AFE3177, AFE3176                                                                |
| ISafe10                                                  | Is110                                             | 1029      | 2           | 100                            | AFE1895, AFE3183                                                                |

NF = Not found; <sup>†</sup>two degenerate copies with N-terminal similarity.

**Predicted hydrogenase systems.**

| <b>Genome ID</b>           | <b>Gene name</b> | <b>Predicted function</b>                                                                              | <b>Predicted location</b> | <b>Predicted TM* domains</b> | <b>Domains and motifs</b>                                                           |
|----------------------------|------------------|--------------------------------------------------------------------------------------------------------|---------------------------|------------------------------|-------------------------------------------------------------------------------------|
| <b>Group 4 hydrogenase</b> |                  |                                                                                                        |                           |                              |                                                                                     |
| AFE2154                    | <i>hyfI</i>      | hydrogenase-4, I subunit, [NiFe]-hydrogenase-3-type complex, small subunit/NADH:quinone oxidoreductase | cytoplasm                 | -                            | PF01058,PS00527,PIRSF002913,PIRSF500034,G3DSA:A:3.40.50.700,PTHR11995:SF3,PTHR11995 |
| AFE2153                    | <i>hyfG</i>      | hydrogenase-4, G subunit, [Ni-Fe] hydrogenase, Nickel-dependent hydrogenase, large subunit             | cytoplasm                 | -                            | PTHR11993,PF00329,PF00346,G3DSA:1.10.645.10                                         |
| AFE2152                    | <i>hyfF</i>      | hydrogenase-4, F subunit, (NADH-ubiquinone oxidoreductase)                                             | membrane                  | 12                           | PF00361,PTHR22773:SF40                                                              |
| AFE2151                    | <i>hyfE</i>      | hydrogenase-4, E subunit                                                                               | membrane                  | 7                            |                                                                                     |
| AFE2150                    | <i>hyfC</i>      | hydrogenase-4, C subunit, (Respiratory-chain NADH dehydrogenase)                                       | membrane                  | 8                            | PTHR11432                                                                           |
| AFE2149                    | <i>hyfB</i>      | hydrogenase-4, B subunit, (NADH-ubiquinone oxidoreductase)                                             | membrane                  | 17                           | PR01434,PF00361,PTHR22773:SF13                                                      |
| <b>Group 3 hydrogenase</b> |                  |                                                                                                        |                           |                              |                                                                                     |
| AFE0937                    | <i>hoxH</i>      | [NiFe] hydrogenase, beta subunit, (4Fe-4S ferredoxin, iron-sulfur binding)                             | cytoplasm                 | -                            | PS00198                                                                             |
| AFE0939                    | <i>hoxY</i>      | [NiFe] hydrogenase, gamma subunit, (Cytochrome-c3 hydrogenase)                                         | cytoplasm                 | -                            | PF00970,PF00175,PIRSF006816,PTHR11938:SF7,PR00406,G3DSA:3.40.50.80                  |
| AFE0938                    | <i>hoxU</i>      | [NiFe] hydrogenase, delta subunit, (NADH ubiquinone oxidoreductase)                                    | cytoplasm                 | -                            | PF01058,G3DSA:3.40.50.700                                                           |
| AFE0937                    | <i>hoxF</i>      | [NiFe] hydrogenase, alpha subunit, (Nickel-dependent hydrogenase, large subunit)                       | cytoplasm                 | -                            | PF00374,G3DSA:1.10.645.10,PS00508                                                   |
| <b>Group 2 hydrogenase</b> |                  |                                                                                                        |                           |                              |                                                                                     |
| AFE0701                    | <i>hupS</i>      | hydrogenase-2, small subunit                                                                           | cytoplasm                 | -                            | PF08425,PF01058,3DSA:4.10.480.10,G3DSA:3.40.50                                      |

|                                |             |                                                                               |           |   |                                                                                 |
|--------------------------------|-------------|-------------------------------------------------------------------------------|-----------|---|---------------------------------------------------------------------------------|
|                                |             | (Nickel-dependent hydrogenase, small subunit)                                 |           |   | .700,PR00614                                                                    |
| AFE0702                        | <i>hupL</i> | hydrogenase-2, large subunit<br>(Nickel-dependent hydrogenase, large subunit) | cytoplasm | - | PF00374,G3DSA:1.10.645.10,PS00507                                               |
| <b>Group 1<br/>hydrogenase</b> |             |                                                                               |           |   |                                                                                 |
| AFE3286                        | <i>hynL</i> | [Ni-Fe] hydrogenase, large subunit                                            | cytoplasm | - | PS00507,PS00508,PTHR11993,PF00374,G3DSA:1.10.645.10                             |
| AFE3285                        | <i>isp1</i> | 4Fe-4S ferredoxin, iron-sulfur cluster-binding protein                        | cytoplasm | - | G3DSA:1.10.1060.10,PF00037,PF02754,PS00198                                      |
| AFE3284                        | <i>isp2</i> | membrane protein                                                              | membrane  | 5 |                                                                                 |
| AFE3283                        | <i>hynS</i> | [Ni-Fe] hydrogenase, small subunit                                            | periplasm | - | G3DSA:3.40.50.700,G3DSA:4.10.480.10,PR00614,PF08425,PF01058,TIGR00391,TIGR01409 |

\*TM = Transmembrane

## Predicted nutrient transport systems

| Inorganic compound transport systems  | N° of genes | Gene ID                                                                                           |
|---------------------------------------|-------------|---------------------------------------------------------------------------------------------------|
| <b>Sulfate</b>                        |             |                                                                                                   |
| Sulfate permease/carbonic anhydrase   |             |                                                                                                   |
| Sulfate permease                      | 1           | AFE0286                                                                                           |
| Carbonic ahydrase                     | 1           | AFE0287                                                                                           |
| <b>Phosphate</b>                      |             |                                                                                                   |
| Phosphate ABC transport               |             |                                                                                                   |
| Permease protein                      | 4           | AFE1941, AFE1940, AFE1438, AFE1437                                                                |
| Periplasmic phosphate binding protein | 2           | AFE1939, AFE1436                                                                                  |
| ATP binding protein                   | 1           | AFE1439                                                                                           |
| <b>Iron</b>                           |             |                                                                                                   |
| TonB dependent transport              |             |                                                                                                   |
| ExbB                                  | 7           | AFE3003, AFE2299, AFE2273, AFE2270, AFE1485, AFE0768, AFE0485                                     |
| ExbD                                  | 6           | AFE3004, AFE2300, AFE2269, AFE1486, AFE0769, AFE0486                                              |
| TonB                                  | 7           | AFE3002, AFE2304, AFE2301, AFE2275, AFE2268, AFE1487, AFE0770                                     |
| TonB dependent receptor               | 11          | AFE2935, AFE1483, AFE1492, AFE2040, AFE2998, AFE2302, AFE2298, AFE2292, AFE2288, AFE0763, AFE3229 |
| Fe/Mo ABC transport                   |             |                                                                                                   |
| Permease protein FecCD family         | 2           | AFE1495, AFE1490                                                                                  |
| ATP binding protein                   | 1           | AFE1491                                                                                           |
| Periplasmic iron binding protein      | 2           | AFE1494, AFE1489                                                                                  |
| Periplasmic molybdate binding protein | 1           | AFE1493                                                                                           |
| Fe II FeoABC                          |             |                                                                                                   |

|                                                                    |   |                                             |
|--------------------------------------------------------------------|---|---------------------------------------------|
| Ferrous iron transport protein A                                   | 1 | AFE2523                                     |
| Ferrous iron transport protein B                                   | 1 | AFE2524                                     |
| Ferrous iron transport protein C                                   | 1 | AFE2525                                     |
| MntH system                                                        |   |                                             |
| MntH system                                                        | 1 | AFE0105                                     |
| Porins                                                             |   |                                             |
| FeoP                                                               | 1 | AFE2522                                     |
| <b>Ammonium</b>                                                    |   |                                             |
| Ammonium permeases                                                 |   |                                             |
| Amt family                                                         | 2 | AFE2916, AFE2911                            |
| Amt-B family                                                       | 1 | AFE1922                                     |
|                                                                    |   |                                             |
| <b>Organic compound transport systems</b>                          |   |                                             |
| Amino acid transport                                               |   |                                             |
| Amino acid permease                                                | 5 | AFE2659, AFE2457, AFE1782, AFE0719, AFE0489 |
| Dipeptide ABC transport                                            |   |                                             |
| Permease protein                                                   | 2 | AFE2991, AFE2990                            |
| Periplasmic peptide binding protein                                | 2 | AFE2992, AFE2987                            |
| ATP binding protein                                                | 2 | AFE2989, AFE2988                            |
| Carbohydrate transport                                             |   |                                             |
| PTS system                                                         | 1 | AFE3018-AFE3023                             |
| Carbohydrate selective porins                                      | 1 | AFE2250                                     |
| MFS sugar transporter                                              | 1 | AFE2312                                     |
| Sugar permease LacY family                                         | 1 | AFE1971                                     |
| Nucleotides and nucleosides                                        |   |                                             |
| cytosine/purines/uracil/thiamine/allantoin permease family protein | 1 | AFE0771                                     |
| Phosphonate                                                        |   |                                             |
| Phosphate ABC transport                                            |   |                                             |

|  |                     |   |                           |
|--|---------------------|---|---------------------------|
|  | ATP binding protein | 2 | AFE2285, AFE2283, AFE2282 |
|--|---------------------|---|---------------------------|

### Predicted components involved in osmotic balance

| Predicted K <sup>+</sup> , Na <sup>+</sup> , Mg <sup>2+</sup> , Co <sup>2+</sup> , Cl <sup>-</sup> , and H <sup>+</sup> transport | N <sup>o</sup> of genes | Gene ID                            |
|-----------------------------------------------------------------------------------------------------------------------------------|-------------------------|------------------------------------|
| Na <sup>+</sup> /H <sup>+</sup> antiporter                                                                                        | 4                       | AFE2454, AFE2205, AFE2245, AFE0791 |
| Na <sup>+</sup> /Ca <sup>2+</sup> exchanger                                                                                       | 1                       | AFE0587                            |
| Mg <sup>2+</sup> translocating P-type ATPase                                                                                      | 1                       | AFE2327                            |
| Mg <sup>2+</sup> and Co <sup>2+</sup> transport protein                                                                           | 4                       | AFE0599, AFE3221, AFE3219, AFE3218 |
| H <sup>+</sup> efflux P-type ATPase                                                                                               | 2                       | AFE3086, AFE0818                   |
| Voltage-gated potassium K <sup>+</sup> channel                                                                                    | 2                       | AFE3093, AFE2922                   |
| K <sup>+</sup> uptake protein                                                                                                     | 1                       | AFE1753                            |
| K <sup>+</sup> efflux system protein                                                                                              | 1                       | AFE1968                            |
| Kdp ATPase system protein A                                                                                                       | 3                       | AFE2477, AFE2475, AFE2232          |
| Kdp ATPase system protein B                                                                                                       | 2                       | AFE2474, AFE2233                   |
| Kdp ATPase system protein C                                                                                                       | 2                       | AFE2473                            |
| Kdp ATPase system protein F                                                                                                       | 2                       | AFE2476, AFE2231                   |
| Voltage gated Cl <sup>-</sup> channel                                                                                             | 3                       | AFE0815, AFE0814, AFE3129          |
| Mechanosensitive ion channel family protein                                                                                       | 1                       | AFE1784                            |
| Large conductance mechanosensitive channel protein                                                                                | 1                       | AFE3260                            |
| <b>Undefined cation transport</b>                                                                                                 |                         |                                    |
| Cation ABC transporter, permease protein                                                                                          | 2                       | AFE0605, AFE0604                   |
| Cation ABC transporter, ATP-binding protein                                                                                       | 1                       | AFE0603                            |
| Cation ABC transporter, periplasmic binding                                                                                       | 1                       | AFE0602                            |

|                                                 |   |                           |
|-------------------------------------------------|---|---------------------------|
| protein                                         |   |                           |
| Cation diffusion facilitator family transporter | 3 | AFE2420, AFE1496, AFE1430 |
| Cation efflux family protein                    | 1 | AFE0465                   |
| Cation efflux permease                          | 1 | AFE2424                   |
| Cation efflux system protein                    | 1 | AFE2782                   |
| Metal ion transporter                           | 2 | AFE0920, AFE0105          |

### Predicted heavy metal resistance systems

| Heavy metal resistance and efflux               | Gene ID                   |
|-------------------------------------------------|---------------------------|
| <b>Ars system</b>                               |                           |
| Arsenate reductase ( <i>arsC</i> )              | AFE2860                   |
| Arsenate repressor ( <i>arsR</i> )              | AFE2859                   |
| Arsenate efflux pump ( <i>arsB</i> )            | AFE2858                   |
| Unknown function ( <i>arsH</i> )                | AFE2857                   |
| <b>Mer system</b>                               |                           |
| Mercury co-repressor ( <i>merD</i> )            | AFE2483                   |
| Hg <sup>2+</sup> reductase ( <i>merA</i> )      | AFE2481                   |
| Hg <sup>2+</sup> uptake protein ( <i>merC</i> ) | AFE2480                   |
| <b>Heavy metal efflux</b>                       |                           |
| Copper translocating P-type ATPase (3)          | AFE2779, AFE2439, AFE2021 |
| Copper resistance protein CopC                  | AFE2650                   |
| Copper resistance protein CopD                  | AFE2651                   |
| Heavy metal efflux outer membrane protein (2)   | AFE1949, AFE2434          |
| Heavy metal efflux pump CzcA family (2)         | AFE2431, AFE1947          |
| Heavy metal efflux transporter MFP subunit (2)  | AFE2433, AFE1948          |

|                                       |                  |
|---------------------------------------|------------------|
| Cation-transporting P-type ATPase (2) | AFE2944, AFE1988 |
|---------------------------------------|------------------|

### Predicted toxic organic compounds extrusion systems

| Drug efflux                                        | N° of genes | Gene ID                                                       |
|----------------------------------------------------|-------------|---------------------------------------------------------------|
| Toluene transport system                           |             |                                                               |
| TolB protein                                       | 1           | AFE0067                                                       |
| TolA protein                                       | 1           | AFE0066                                                       |
| TolR protein                                       | 1           | AFE0065                                                       |
| TolQ protein                                       | 1           | AFE0064                                                       |
| Toluene tolerance protein                          | 2           | AFE1830, AFE0161                                              |
| Toluene ABC transporter ATP binding protein        | 2           | AFE0163, AFE0158                                              |
| Toluene transport system Ttg2E protein             | 1           | AFE0162                                                       |
| Toluene tolerance ABC-system periplasmic component | 1           | AFE0157                                                       |
| Toluene tolerance protein Ttg2B, putative          | 1           | AFE0156                                                       |
| Fosmidomycin resistance protein, putative          | 1           | AFE1977                                                       |
| AmpG permease protein, putative                    | 1           | AFE1961                                                       |
| Outer membrane protein, OMPP1-FadL-TodX family     | 1           | AFE2542                                                       |
| Drug resistance transporter, EmrB-QacA family      | 7           | AFE2184, AFE2091, AFE1797, AFE2124, AFE0864, AFE0040, AFE0161 |
| RND drug efflux system, outer membrane lipoprotein | 2           | AFE0863, AFE0039                                              |
| Drug resistance secretion protein                  | 1           | AFE0038                                                       |



|                                                           |   |                           |
|-----------------------------------------------------------|---|---------------------------|
| ABC multidrug efflux system                               |   |                           |
| ABC transporter, permease protein                         | 3 | AFE2864, AFE2863, AFE1603 |
| ABC transporter, ATP-binding protein                      | 3 | AFE2862, AFE1606, AFE1605 |
| Secretion protein, HlyD family                            | 3 | AFE2166, AFE2861, AFE1607 |
| Dicarboxylate transport                                   |   |                           |
| C4-dicarboxylate transporter-malic acid transport protein | 3 | AFE1992, AFE1847, AFE0041 |
