# Supplementary material for: Acidithiobacillus ferrooxidans metabolism: from genome sequence to industrial applications
Source: PubMed Central journal article supplement (PMC2621215; doi:10.1186/1471-2164-9-597), 2008-12-11
Supplement: 1471-2164-9-597-S4.pdf [file 1471-2164-9-597-S4.pdf]

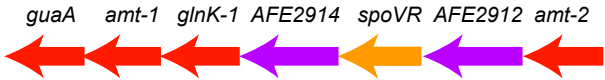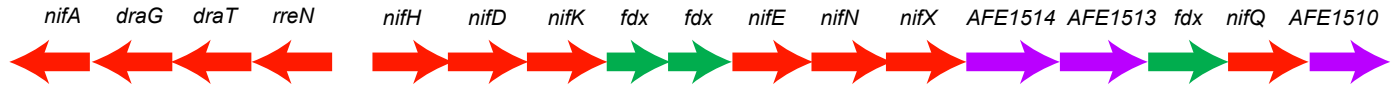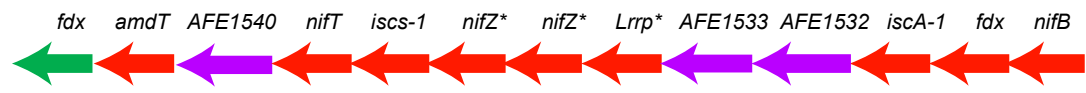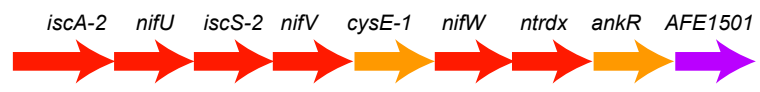

Nitrogen metabolism
  Other functions
  Hypothetical proteins
  Ferredoxin
