# Supplementary material for: Acidithiobacillus ferrooxidans metabolism: from genome sequence to industrial applications
Source: PubMed Central journal article supplement (PMC2621215; doi:10.1186/1471-2164-9-597), 2008-12-11
Supplement: 1471-2164-9-597-S5.pdf [file 1471-2164-9-597-S5.pdf]

**Genes involved in type IV pilus biosynthesis**

|         |             |                                                     |
|---------|-------------|-----------------------------------------------------|
| AFE2710 | -           | Pilin                                               |
| AFE2708 | <i>cpaA</i> | Flp pilus assembly protein protease CpaA            |
| AFE2707 | <i>tadG</i> | Pilus assembly protein                              |
| AFE2705 | <i>cpaB</i> | Flp pilus assembly protein                          |
| AFE2704 | <i>cpaC</i> | Flp pilus assembly protein secretin                 |
| AFE2703 | <i>cpaE</i> | Pilus assembly protein CpaE                         |
| AFE2702 | <i>tadA</i> | Tight adherence protein TadA                        |
| AFE2701 | <i>tadB</i> | Tight adherence protein TadB                        |
| AFE2700 | <i>tadC</i> | Tight adherence protein TadC                        |
| AFE2699 | <i>tadD</i> | Flp pilus assembly protein TadD                     |
| AFE0973 | -           | Type IV pilin biogenesis peptidase                  |
| AFE0972 | <i>pilC</i> | Type IV pilus biogenesis protein PilC               |
| AFE0971 | -           | Type IV pilus biogenesis protein                    |
| AFE0970 | -           | Type IV pilin                                       |
| AFE0969 | -           | Type IV pilin                                       |
| AFE0968 | -           | Hypothetical protein                                |
| AFE0967 |             | Type IV pilin biogenesis protein                    |
| AFE0739 | <i>pilM</i> | Type IV pilus assembly protein PilM                 |
| AFE0738 | <i>pilN</i> | Type IV pilus biogenesis protein PilN               |
| AFE0737 | <i>pilO</i> | Fimbrial assembly protein PilO                      |
| AFE0736 | <i>pilP</i> | Type 4 fimbrial biogenesis protein PilP             |
| AFE0735 | <i>pilQ</i> | Fimbrial assembly protein PilQ                      |
| AFE0416 | -           | Pilin                                               |
| AFE0186 | <i>pilD</i> | Type IV pilus prepilin peptidase PilD               |
| AFE0185 | <i>pilR</i> | Type IV fimbriae expression regulatory protein PilR |
| AFE0184 | <i>pilS</i> | Sensor protein PilS                                 |
| AFE0183 | -           | Type IV pilus assembly protein                      |
| AFE0007 | -           | Outer membrane usher protein                        |
| AFE0006 | -           | Pilus chaperone protein                             |
